# Supplementary material
Source: publisher figshare collection journal article supplement (https://diabetesjournals.figshare.com/articles/dataset/_/12691940)
Supplement: Supplementary file 1 [file 1]

**Supplementary Table. Cox Regressions Showing Hazard Ratio for Women vs. Men for CHD, CVD and Total Mortality According to Calcium Score and Characteristics**

|                                                   | <b>CHD Mortality</b>            | <b>p-value</b> | <b>CVD Mortality</b>             | <b>p-value</b> | <b>Total Mortality</b>           | <b>p-value</b> |
|---------------------------------------------------|---------------------------------|----------------|----------------------------------|----------------|----------------------------------|----------------|
| CAC 0 (n=1,163)                                   | 0.49 (0.04-5.78)                | 0.57           | 0.76 (0.22-2.59)                 | 0.66           | 0.76 (0.40-1.45)                 | 0.40           |
| CAC 1-100 (n=1,349)                               | 0.93 (0.29-2.96)                | 0.90           | 0.76 (0.30-1.91)                 | 0.56           | 1.18 (0.77-1.81)                 | 0.45           |
| CAC 101-400 (n=870)                               | 2.11 (0.85-5.24)                | 0.11           | 2.19 (1.12-4.28)                 | 0.02           | 1.42 (0.96-2.10)                 | 0.08           |
| CAC 401+ (n=1,121)                                | 0.97 (0.53-1.77)                | 0.91           | 1.81 (1.19-2.76)                 | <0.01          | 1.68 (1.27-2.22)                 | <0.001         |
| 1 Calcified Vessel (n=538)                        | 2.23 (0.49-10.05)<br>[7 events] | 0.30           | 1.28 (0.49-3.35)<br>[17 events]  | 0.61           | 1.50 (0.94-2.39)<br>[72 events]  | 0.09           |
| 2 Calcified Vessels (n=579)                       | 1.44 (0.45-4.58)<br>[12 events] | 0.54           | 1.46 (0.72-2.95)<br>[32 events]  | 0.30           | 1.34 (0.88-2.05)<br>[90 events]  | 0.17           |
| 3-4 Calcified Vessels (n=1,404)                   | 0.85 (0.47-1.53) [72 events]    | 0.59           | 1.49 (0.99-2.23)<br>[113 events] | 0.05           | 1.19 (0.91-1.54)<br>[287 events] | 0.21           |
| 0 Lesions (n=1,196)                               | 0.64 (0.20-2.00)                | 0.44           | 1.19 (0.55-2.58)                 | 0.65           | 0.88 (0.58-1.32)                 | 0.53           |
| 1-3 Lesions (n=431)                               | †                               | 0.70           | 0.70 (0.14-3.59)                 | 0.67           | 0.72 (0.33-1.57)                 | 0.41           |
| 4 or more Lesions (n=1,219)                       | 0.66 (0.31-1.41)                | 0.28           | 1.13 (0.68-1.87)                 | 0.64           | 1.12 (0.82-1.55)                 | 0.48           |
| Total CAC Volume <52.70 mm <sup>3</sup> (n=1,023) | 1.53 (0.31-7.60)                | 0.60           | 1.03 (0.39-2.71)                 | 0.95           | 2.01 (1.13-3.60)                 | 0.02           |
| Total CAC Volume ≥52.70 mm <sup>3</sup> (n=1,024) | 1.43 (0.71-2.89)                | 0.31           | 2.61 (1.60-4.25)                 | 0.0001         | 1.61 (1.16-2.24)                 | 0.005          |
| Lesion Size <20.40 HU/mm <sup>3</sup> (n=312)     | †                               | 1.00           | 0.38 (0.05-3.03)                 | 0.36           | 1.27 (0.49-3.29)                 | 0.62           |
| Lesion Size ≥20.40 HU/mm <sup>3</sup> (n=312)     | 1.23 (0.25-6.13)                | 0.80           | 3.49 (1.38-8.81)                 | 0.008          | 1.28 (0.73-2.24)                 | 0.67           |

Median cutpoints used for volume and lesion size Each entry is a separate unadjusted regression showing the Female: Male HR (with 95% CI) for prediction of each outcome. †estimates not provided due to being unreliable due to few events.
